# Supplementary material for: Ethical Impact of Real-Time Surgical Communication on Family Perceptions of Transparency, Fairness, and Trust: A Prospective Study
Source: Research Square preprint supplement (doi:10.21203/rs.3.rs-6858963/v1), 2025-07-22
Supplement: Supplementary file 1 [file 9271021de78a796b9fa955dd.docx]

# Supplementary File 1. Medical Information Transparency Scale (MITS)

The Medical Information Transparency Scale (MITS) was developed by the research team for this study to evaluate family members’ perceived transparency during the intraoperative period. Existing validated instruments did not adequately capture the specific ethical dimensions of real-time communication from the surgical team to family members, prompting the need for a context-specific tool.

Item generation was based on a systematic literature review of organizational and medical transparency theory, along with semi-structured qualitative interviews with 12 adult family members who had previously experienced the perioperative process. These interviews explored themes such as information expectations, perceived gaps, emotional responses, and indicators of trustworthiness. An initial pool of 10 items was generated and refined through iterative team discussion.

Content validity was evaluated by an expert panel including three senior anesthesiologists, two healthcare ethicists, and one professor specialized in health communication. The panel rated each item for relevance, clarity, and completeness using a modified Delphi method. Five items were retained based on consensus agreement and theoretical coverage.

The final 5-item scale was piloted with the study population. Exploratory factor analysis supported a unidimensional structure (KMO = 0.81; Bartlett’s test p < 0.001), with a single factor explaining 67.3% of the total variance. The internal consistency of the scale was high, with a Cronbach’s alpha of 0.89, indicating strong reliability.

Each item is rated on a 5-point Likert scale (1 = strongly disagree to 5 = strongly agree), with total scores ranging from 5 to 25. Higher total scores reflect higher levels of perceived transparency during the intraoperative period.

**Final Items of the MITS**

1. I felt the information I received during the surgery was timely.
2. The updates I received were clear and easy to understand.
3. I felt well-informed about the surgery’s progress.
4. The information shared by the team felt honest and transparent.
5. The updates covered all aspects I needed to know to feel reassured.
