# Supplementary material for: Ethical Impact of Real-Time Surgical Communication on Family Perceptions of Transparency, Fairness, and Trust: A Prospective Study
Source: Research Square preprint supplement (doi:10.21203/rs.3.rs-6858963/v1), 2025-07-22
Supplement: Supplementary file 2 [file a26ee43d34441e09cc1eff5e.docx]

**Statement on Instrument Use and Permissions**

This supplementary statement describes the use, adaptation status, and permission considerations for the measurement instruments employed in the study titled:**“Enhancing Family Trust Through Real-Time Intraoperative Communication: A Prospective Study in Surgical Ethics.”**

All instruments were employed for academic, non-commercial research. No modifications were made to validated scales unless otherwise specified. Instruments were implemented in line with academic fair use standards and appropriately cited in the manuscript.

**1.Medical Information Transparency Scale (MITS)**

The MITS was developed by the research team specifically for this study and is an original, unpublished instrument. It was used without external licensing and solely for academic, non-commercial purposes. The full version of the scale is provided in Supplementary File 2.

**2. Health Care Justice Questionnaire (HCJQ)**

The 10-item HCJQ was used in its original published form to assess perceived procedural fairness in healthcare settings. The questionnaire addresses key dimensions such as participation in decision-making, clarity of communication, and consistency of care, with each item rated on a 5-point Likert scale. The instrument has previously demonstrated adequate internal consistency (Cronbach’s α ≈ 0.88), which was replicated in the current study. No content modifications were made. The HCJQ was used for academic purposes in accordance with fair use principles, and no formal license was required.

**3. Wake Forest Physician Trust Scale – Surgical Team Version**

This 11-item scale, originally developed for use in primary care and adapted for surgical settings, was employed to assess family members’ trust in the surgical team. The items are rated on a 5-point Likert scale, with higher scores indicating greater trust. The scale has been validated in perioperative contexts (Cronbach’s α = 0.87). In this study, it was used in its validated published form without modification. Its academic use is consistent with established citation and usage norms. No formal permission was required.

**4. State-Trait Anxiety Inventory (STAI) – State Subscale**

Family members’ situational anxiety was assessed using the 20-item state subscale of the STAI, administered at three timepoints (preoperative, 2 hours postoperative, and postoperative day one). Each item is rated on a 4-point Likert scale. The Chinese version of the STAI has been validated and demonstrated robust internal consistency (Cronbach’s α > 0.85). The instrument was used without any alterations for academic purposes only and cited accordingly. No license was required for this form of scholarly use.

**5. Medical Communication Satisfaction Scale (MCSS)**

The MCSS, a 7-item scale derived from the Client Satisfaction Questionnaire, was used to measure satisfaction with postoperative communication. It has been previously validated in clinical contexts. Each item is rated on a 5-point Likert scale, with higher scores reflecting greater satisfaction. The scale was used in its original published version with no changes. As its use was restricted to academic research and properly cited, no formal permission was necessary.

**Author Group**

Yun Linjun, Luo Xi, Fang Linjie, Luowulajing, Ying Yanmei, Li Yuanhong, Zhou Li

**Date:** June 16, 2025
